# Supplementary material for: Stomatal Responses of Two Drought-Tolerant Barley Varieties with Different ROS Regulation Strategies under Drought Conditions
Source: MDPI journal article supplement (doi:10.3390/antiox12040790), 2023-03-23
Supplement: s1 [file s1]

**Figure S1. Quantitative real-time PCR validation of differentially expressed genes.**

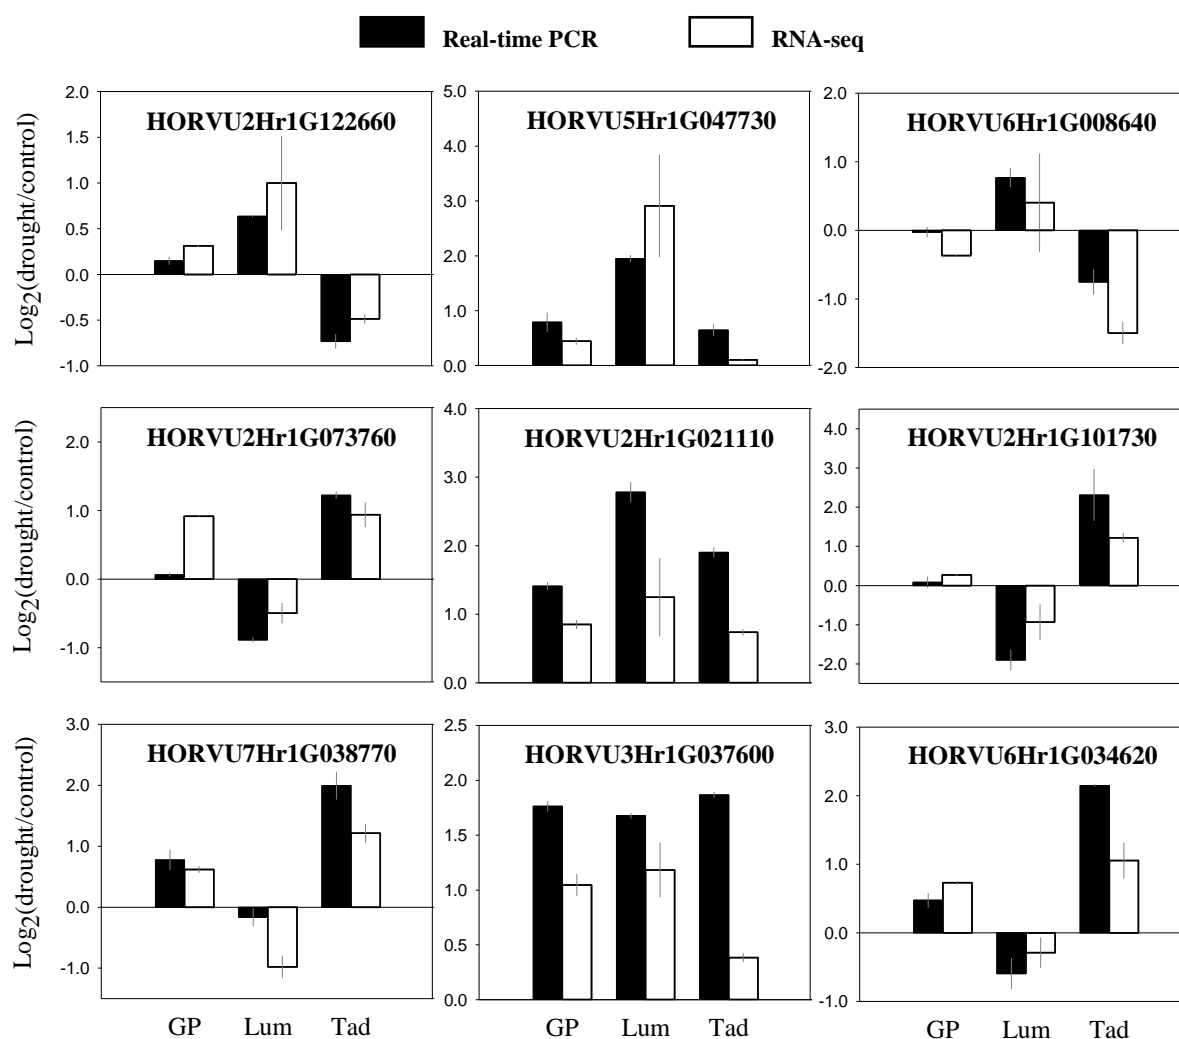

Expression patterns of nine DEGs are identified in Real-time PCR (black), RNA-Seq (white), in response to drought stress by qRT-PCR. GAPDH was used as internal control.

Figure S2. Gene expression of the ROS-scavenging network in barley under drought.

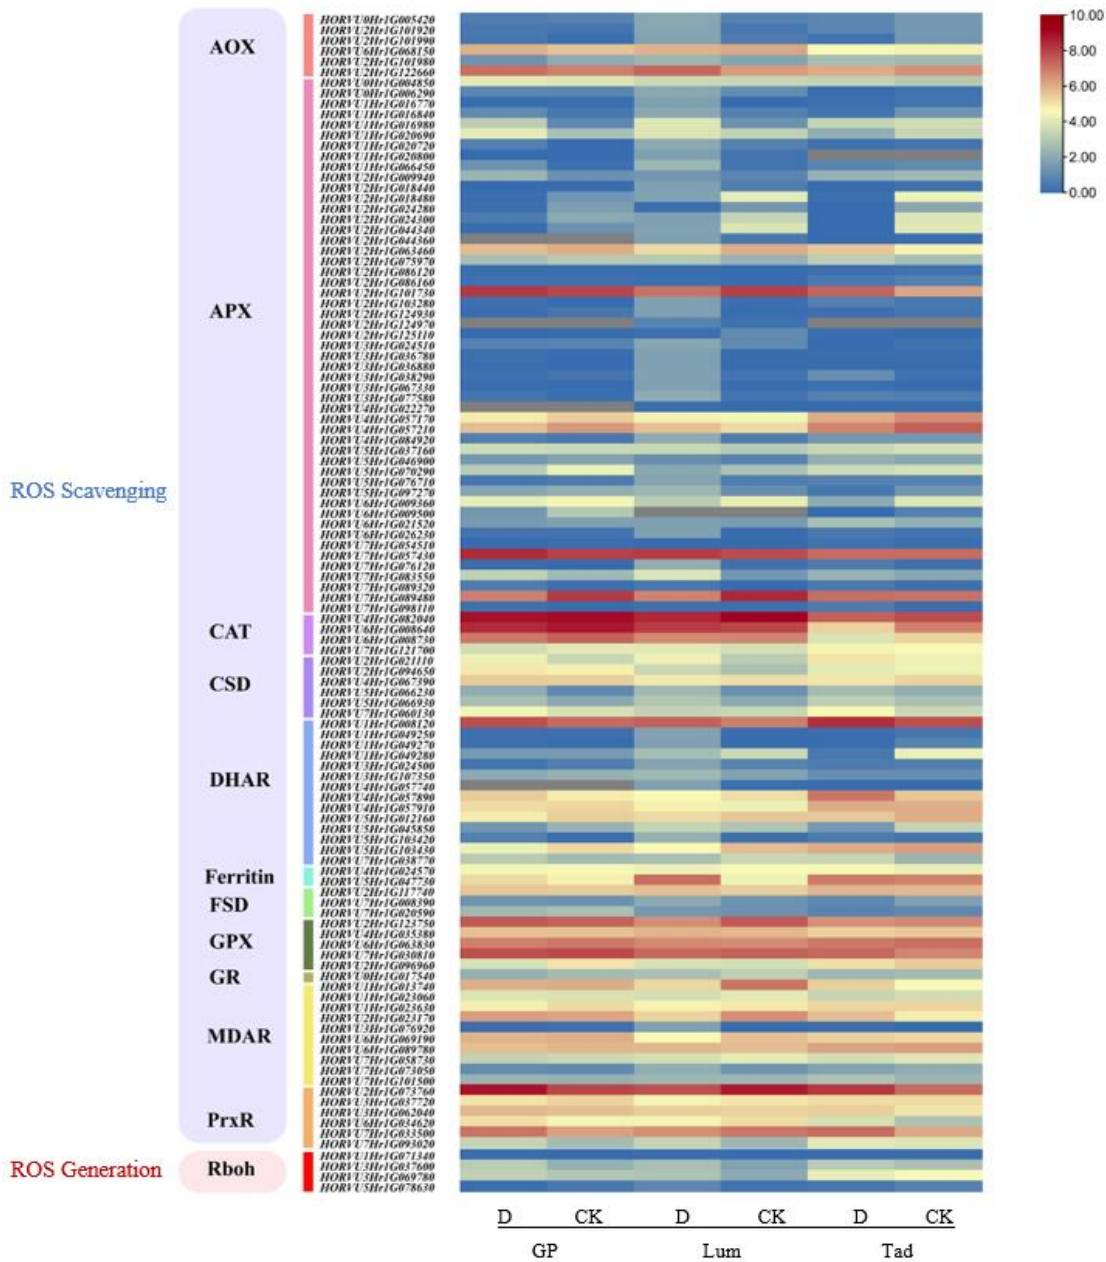

Main ROS genes and their corresponding enzymatic activities are listed. With the exception of NADPH oxidase (Rboh, a ROS producer), all genes included in the figure encode ROS-scavenging enzymes. The samples and treatments are displayed under each column.

**Figure S3. Transmission electron microscopy (TEM) analysis of the leaf cuticle membrane on GP, Lum and Tad.**

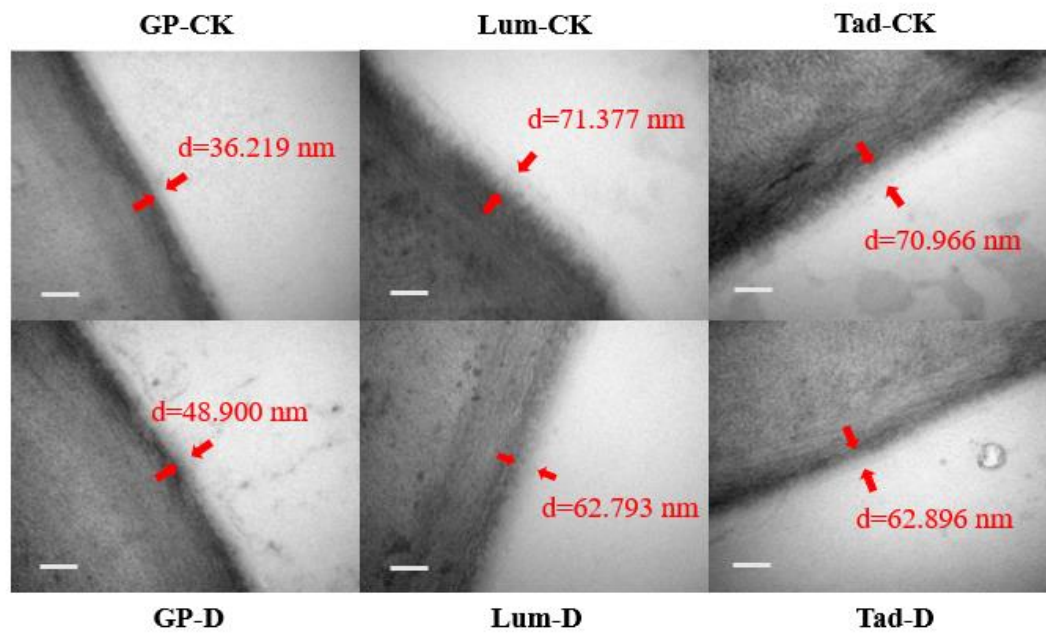

The leaf cuticle membrane was marked by red arrows, with thickness value (d). The samples and treatments are displayed on or under each column. Bar = 100 nm.

**Table S1. Primers used for qRT-PCR.**

| <b>Gene ID</b>   | <b>Forward</b>           | <b>Reverse</b>              |
|------------------|--------------------------|-----------------------------|
| HORVU2Hr1G122660 | AGCTCCAAATTCCAGGAGGC     | CATCGTCTTGCAATGCTCCG        |
| HORVU6Hr1G008640 | CTCTACGACTCCATCGACGC     | TCTGGCCATGTCTTGGTGTC        |
| HORVU5Hr1G047730 | CGTATCACTCCCTCTTCGCC     | GGCATCACCTTTCTCGGGAT        |
| HORVU2Hr1G073760 | CATGGGTGCAGACAGAGAGG     | GGTCTCATCCACACTACGGC        |
| HORVU2Hr1G021110 | GTCACCGGACTCAAGGAAGG     | CATCTGTGCTGGAAGGGGAA        |
| HORVU2Hr1G101730 | CGAACCGGGGTGAGGAAATG     | CGCCGATCAGATCCCTTCTG        |
| HORVU7Hr1G038770 | CCTACTCATGGCTGTCCTGC     | CTGCGTGAAAGGACAATCGC        |
| HORVU3Hr1G037600 | TCGTTCCGCACTCATTGTCA     | TGAGTCTTGACGCTGGTTCC        |
| HORVU6Hr1G034620 | GATGGACCTCTCCGACAAGC     | AGGTTGAGCACCTTGACGAC        |
| HvGAPDH          | AAGCATGAAGATACAGGGAGTGTG | AAATTTATTCTCGGAAGAGGTTGTACA |

**Table S2. Light response curve and CO<sub>2</sub> response curve parameters for GP, Lum and Tad plants grown under glasshouse conditions.**

| Parameter                                                                                                      | Control                       |                               |                               | Drought                     |                                 |                          |
|----------------------------------------------------------------------------------------------------------------|-------------------------------|-------------------------------|-------------------------------|-----------------------------|---------------------------------|--------------------------|
|                                                                                                                | GP                            | Lum                           | Tad                           | GP                          | Lum                             | Tad                      |
| Light compensation point<br>(LCP, $\mu\text{mol m}^{-2} \text{s}^{-1}$ )                                       | 17.3523 $\pm$ 2.4292          | 18.1567 $\pm$ 0.6533          | 16.6174 $\pm$ 0.9225          | 22.5166 $\pm$ 6.8029        | 15.2695 $\pm$ 1.1304            | 13.4743 $\pm$ 0.9753     |
| Light saturation point<br>(LSP, $\mu\text{mol m}^{-2} \text{s}^{-1}$ )                                         | 3411.6095 $\pm$ 828.077<br>2a | 4382.9040 $\pm$ 537.76<br>21a | 3426.1838 $\pm$ 328.668<br>4a | 993.6890 $\pm$ 30.041<br>1c | 1734.272733 $\pm$ 363.<br>6590b | 1256.95 $\pm$ 185.1883bc |
| Rate of dark respiration<br>( $R_D$ , $\mu\text{mol m}^{-2} \text{s}^{-1}$ )                                   | 1.1058 $\pm$ 0.1009a          | 1.1627 $\pm$ 0.0349a          | 1.0305 $\pm$ 0.0632a          | 1.0777 $\pm$ 0.1767a        | 0.9319 $\pm$ 0.0699ab           | 0.6841 $\pm$ 0.0525b     |
| Apparent quantum yield<br>(AQY)                                                                                | 0.0674 $\pm$ 0.0025a          | 0.0665 $\pm$ 0.0008ab         | 0.0642 $\pm$ 0.0008ab         | 0.0608 $\pm$ 0.0077ab       | 0.0649 $\pm$ 0.0013ab           | 0.0541 $\pm$ 0.0016b     |
| Light-saturated photosynthetic rate<br>( $A_{L\text{max}}$ , $\mu\text{mol m}^{-2} \text{s}^{-1}$ )            | 20.0962 $\pm$ 1.2667b         | 24.4791 $\pm$ 0.1823a         | 22.6972 $\pm$ 0.4158ab        | 5.3035 $\pm$ 1.1312d        | 12.2042 $\pm$ 2.2115c           | 7.9249 $\pm$ 1.0525d     |
| CO <sub>2</sub> compensation point ( $\mu\text{mol}$ )                                                         | 45.5298 $\pm$ 0.1898cd        | 44.7224 $\pm$ 0.3432d         | 45.6941 $\pm$ 0.2196cd        | 63.9199 $\pm$ 4.9419a       | 51.5657 $\pm$ 0.7436bc          | 52.5431 $\pm$ 0.8398b    |
| CO <sub>2</sub> -saturated photosynthetic rate<br>( $A_{C\text{max}}$ , $\mu\text{mol m}^{-2} \text{s}^{-1}$ ) | 20.0987 $\pm$ 0.8756b         | 24.6869 $\pm$ 1.0919a         | 19.4072 $\pm$ 0.6156b         | 10.1791 $\pm$ 1.5266d       | 17.1779 $\pm$ 1.3232bc          | 14.2836 $\pm$ 0.7962c    |
| Maximum carboxylation rate of Rubisco<br>( $V_{c\text{max}}$ , $\mu\text{mol m}^{-2} \text{s}^{-1}$ )          | 32.0940 $\pm$ 2.5949c         | 38.0105 $\pm$ 2.2577bc        | 39.4827 $\pm$ 1.1446ab        | 32.9072 $\pm$ 1.3504c       | 44.3749 $\pm$ 1.0780a           | 36.3871 $\pm$ 1.4370bc   |
| Maximum electron transport rate<br>( $J_{\text{max}}$ , $\mu\text{mol m}^{-2} \text{s}^{-1}$ )                 | 37.5742 $\pm$ 2.9936c         | 43.765 $\pm$ 2.7417bc         | 47.2829 $\pm$ 0.7699b         | 42.244 $\pm$ 3.5346bc       | 58.2533 $\pm$ 0.4904a           | 43.7247 $\pm$ 1.3139bc   |

The light-response curves and CO<sub>2</sub>-response curves were fit for calculating LCP, LSP,  $R_D$ , AQY,  $A_{L\text{max}}$ , and Apparent CO<sub>2</sub> compensation point,  $A_{C\text{max}}$ ,  $V_{c\text{max}}$ ,  $J_{\text{max}}$ . Data are presented as the means  $\pm$  se (n=3-4), according to one-way ANOVA, followed with a Duncan's test for means comparison.

**Table S3. Stomatal characteristics determined by the photosynthesis measurements in the GP, Lum and Tad.**

| Parameter            | Control         |                 |                | Drought         |                 |                 |
|----------------------|-----------------|-----------------|----------------|-----------------|-----------------|-----------------|
|                      | GP              | Lum             | Tad            | GP              | Lum             | Tad             |
| $g_s$                | 0.2648±0.0017b  | 0.3338±0.0026a  | 0.3351±0.0033a | 0.0770±0.0007d  | 0.1081±0.0010c  | 0.0805±0.0019d  |
| $t_{1/2open}$ (min)  | 7.9264±0.3869a  | 7.3895±0.0902a  | 6.8846±0.7778a | 10.3364±0.8684b | 10.9624±0.4936b | 10.8157±0.5217b |
| $t_{1/2close}$ (min) | 7.2697±0.1116bc | 13.7640±0.4333a | 8.5046±0.4864b | 4.7827±0.1867d  | 6.4565±0.5547c  | 2.9725±0.0302e  |

Dynamics of leaf-level stomatal conductance ( $g_s$ ) were fit for calculating  $t_{1/2open}$  and  $t_{1/2close}$ . Data are presented as the means ± se (n=3-4), according to one-way ANOVA, followed with a Duncan's test for means comparison.

**Table S4. Important differentially expressed genes in GP, Lum and Tad under drought.**

| Gene ID          | Fold change (Drought/control) |        |       | Annotation                                                 |
|------------------|-------------------------------|--------|-------|------------------------------------------------------------|
|                  | GP                            | Lum    | Tad   |                                                            |
| HORVU1Hr1G072210 | 2.40                          | -13.01 | 1.89  | NAD-specific glutamate dehydrogenase                       |
| HORVU1Hr1G072780 | 0.29                          | 2.70   | 0.02  | Gamma-glutamyl phosphate reductase                         |
| HORVU1Hr1G088840 | 4.62                          | 0.74   | 12.60 | Phospholipase A1-II 7                                      |
| HORVU2Hr1G034650 | 0.00                          | 10.35  | -9.78 | zinc finger protein 7                                      |
| HORVU2Hr1G057280 | 0.34                          | 15.98  | 2.89  | NAD-dependent epimerase/dehydratase                        |
| HORVU2Hr1G102840 | 0.25                          | 1.74   | 0.27  | Vacuolar cation/proton exchanger 1b                        |
| HORVU3Hr1G059170 | 1.44                          | 5.76   | 1.22  | Protein phosphatase 2C family protein                      |
| HORVU3Hr1G059220 | -0.88                         | 0.82   | -2.52 | WRKY family transcription factor                           |
| HORVU3Hr1G067360 | 0.31                          | 12.35  | -0.50 | Protein phosphatase 2C family protein                      |
| HORVU4Hr1G022150 | 9.14                          | -11.64 | 3.55  | Carbonic anhydrase                                         |
| HORVU4Hr1G053130 | -0.60                         | -2.58  | -0.74 | calmodulin 3                                               |
| HORVU4Hr1G063980 | 0.53                          | 1.94   | 0.42  | Senescence/dehydration-associated protein-related          |
| HORVU5Hr1G093700 | 1.85                          | 6.08   | 0.87  | lipxygenase 1                                              |
| HORVU6Hr1G009500 | -2.00                         | 0.00   | -5.21 | Peroxidase superfamily protein                             |
| HORVU6Hr1G055440 | -5.41                         | -1.33  | -7.68 | RNA-binding protein 1                                      |
| HORVU6Hr1G074440 | 0.28                          | 2.18   | 0.35  | annexin 7                                                  |
| HORVU7Hr1G076530 | 0.00                          | 3.09   | 0.00  | General transcription factor 2-related zinc finger protein |
| HORVU7Hr1G083550 | 0.88                          | 3.24   | 0.47  | Peroxidase superfamily protein                             |
| HORVU7Hr1G085010 | 0.82                          | 2.24   | 0.37  | Protein phosphatase 2C family protein                      |
| HORVU7Hr1G089320 | 1.99                          | 11.69  | 1.67  | Peroxidase superfamily protein                             |

List of stomatal regulation, MAPK signaling, photosynthesis, and  $\text{Ca}^{2+}$ -transport related genes differentially expressed in GP, Lum and Tad plants. Fold change (Drought vs control) is  $\log_2 N$ , Fold change  $\geq 1$  are up-regulated, between  $0 < |\text{Fold change}| < 1$  are unchanged and Fold change  $\leq -1$  are down-regulated, Q-value  $< 0.001$ .
